# Supplementary material for: Mental Practice Combined with Physical Practice to Enhance Hand Recovery in Stroke Patients
Source: Behav Neurol. 2014 Nov 9;2014:876416. doi: 10.1155/2014/876416 (PMC4241695; doi:10.1155/2014/876416)
Supplement: Supplementary file 1 — The video is presented with the process of motor execution with an unaffected hand for two times in the first person perspective. The process is performed by making a fist, extending the hand and repeating one time. The process of motor imagery is similar as motor execution but have no obvious motor output. [file 876416.f1.zip]

Archive with 2 entries (1 files):
- 876416.f1/
- 876416.f1/mat.876416.v2.AVI
